# Supplementary material for: Effect of pre-shear on structural behavior and pipeline restart of gelled waxy crude oil
Source: Royal Society of Chemistry journal article supplement (doi:10.1039/c6ra16346g), 2016-01-01
Supplement: c6ra16346g1.pdf [file c6ra16346g1.pdf]

## Supporting Information

# Effect of pre-shear on structural behavior and pipeline restart of gelled waxy crude oil

Youquan Bao, Jinjun Zhang\*, Xinyi Wang, Wenwen Liu

National Engineering Laboratory for Pipeline Safety/ MOE Key Laboratory of Petroleum  
Engineering/ Beijing Key Laboratory of Urban Oil & Gas Distribution Technology, China  
University of Petroleum-Beijing, Beijing 102249, China

---

\* Corresponding author. Tel: +86-10-8973-4627; Fax: +86-10-8973-4627.

E-mail address: [zhangjj@cup.edu.cn](mailto:zhangjj@cup.edu.cn)

## 1. Repeatability tests of SAOS and stepwise increases in shear rate

Fig. S1 and Fig. S2 show the repeatability tests of SAOS and stepwise increases in shear rate. It is obvious that the repeatability is good.

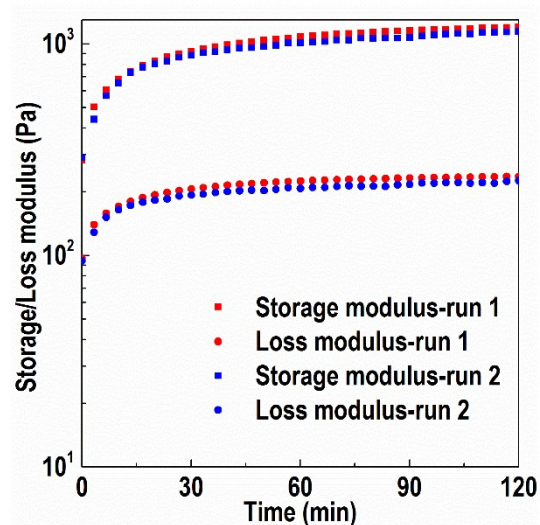

Fig. S1. Repeatability test of SAOS (pre-shear temperature  $T_{p-s}=34$  °C and rate of pre-shear  $\dot{\gamma}_{p-s}=0$  s<sup>-1</sup>)

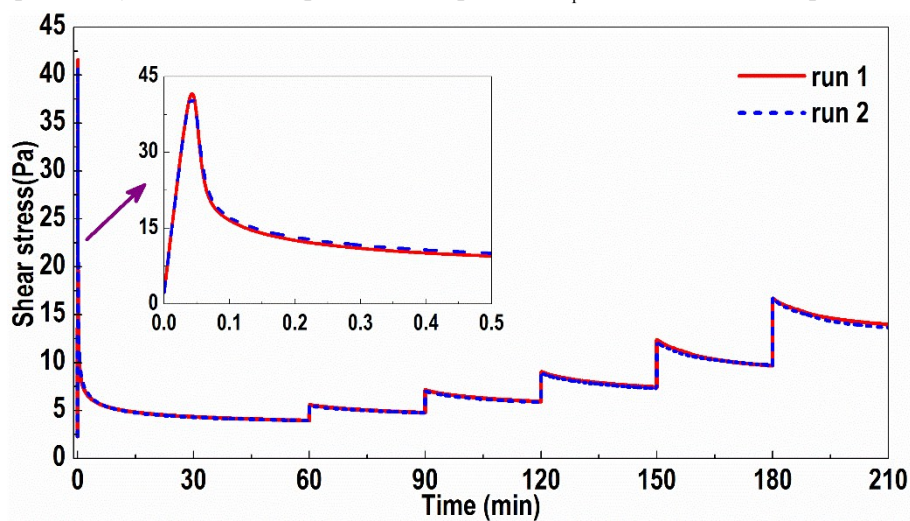

Fig. S2. Repeatability test of stepwise increases in shear rate (pre-shear temperature  $T_{p-s}=34$  °C and rate of pre-shear  $\dot{\gamma}_{p-s}=0$  s<sup>-1</sup>)

## 2. Comparison between test results and fitted results of shear stress responses to stepwise increases in shear rate

Fig. S3 shows the comparison between the test results and fitted results of shear stress responses to stepwise increases in shear rate for different pre-shear conditions. It can be seen that the overlap between test results and fitted results is good.

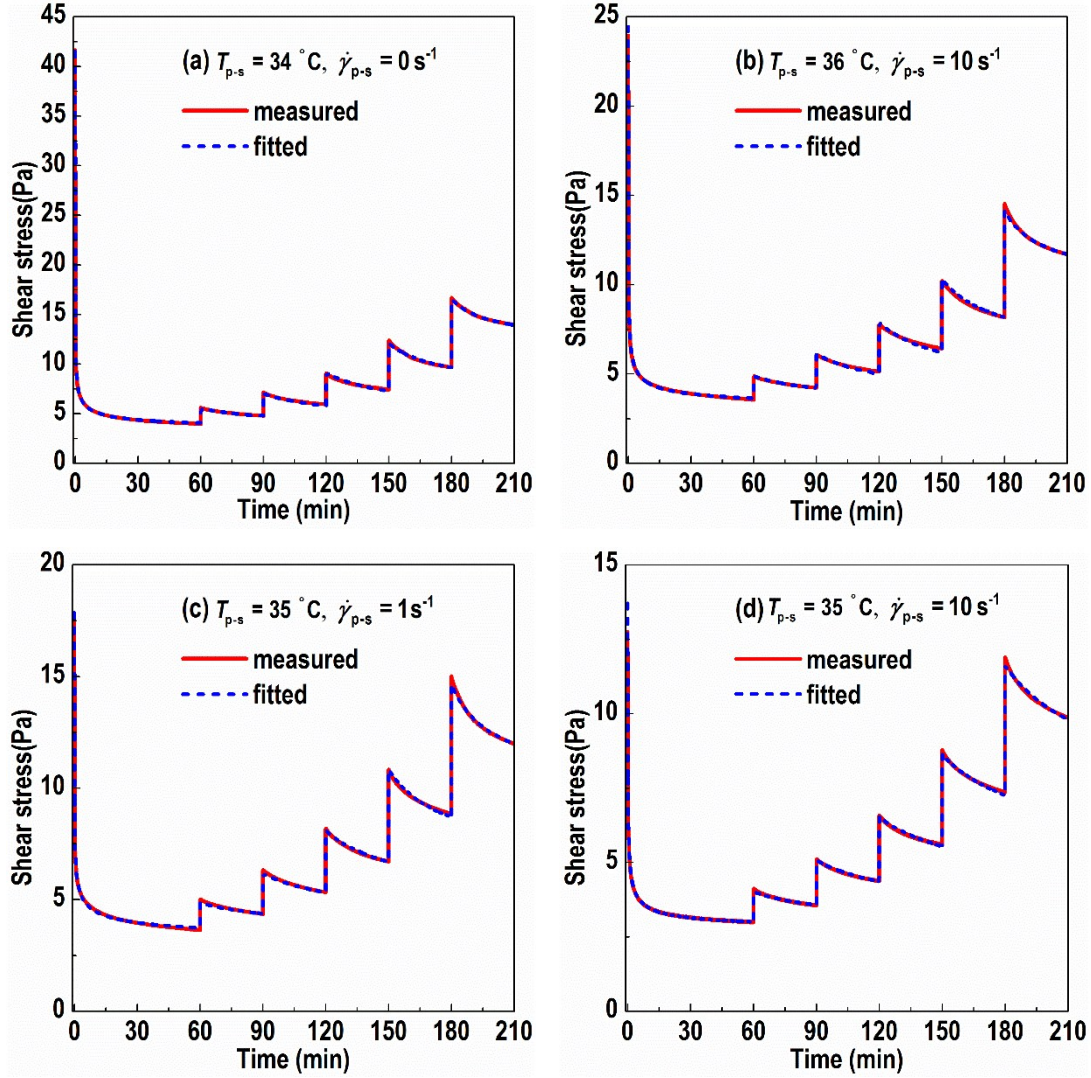

Fig. S3. Comparison between test results and fitted results of shear stress responses to stepwise increases in shear rate

### 3. Mesh size study

To ensure the mesh independence of the simulation results, the effect of mesh size on the simulation results is investigated. Five combinations of grid numbers are shown in Table S1, and the condition of  $T_{p-s}=35\text{ }^{\circ}\text{C}$ ,  $\dot{\gamma}_{p-s}=10\text{ s}^{-1}$  and  $P_{in}^*=0.003$  is taken as an example to show the results of the mesh size study.

Fig. S4 shows the radial distribution of the inlet velocity for different radial mesh sizes at times  $t^*=1$  and  $t^*=10$ . The results for radial grid numbers  $N_r=25$  and  $N_r=50$  are almost the same, so the radial grid number is conservatively set to 50. Fig. S5 shows the time evolution of pressure  $P^*$  at axial positions  $z^*=1$  and  $z^*=0.9$  for different axial mesh sizes. There are some high-frequency oscillations around time  $t^*=1$  if the grid is sparse, and the oscillation amplitude

decreases with increasing axial grid number. When the number of axial grids is equal to or greater than 300, the oscillation disappears, so the axial grid number  $N_z=500$  is conservatively confirmed.

**Table S1.** Combinations of grid number in axial direction and radial direction

| Mesh   | $N_z$ | $N_r$ |
|--------|-------|-------|
| Mesh 1 | 500   | 10    |
| Mesh 2 | 500   | 25    |
| Mesh 3 | 500   | 50    |
| Mesh 4 | 300   | 50    |
| Mesh 5 | 100   | 50    |

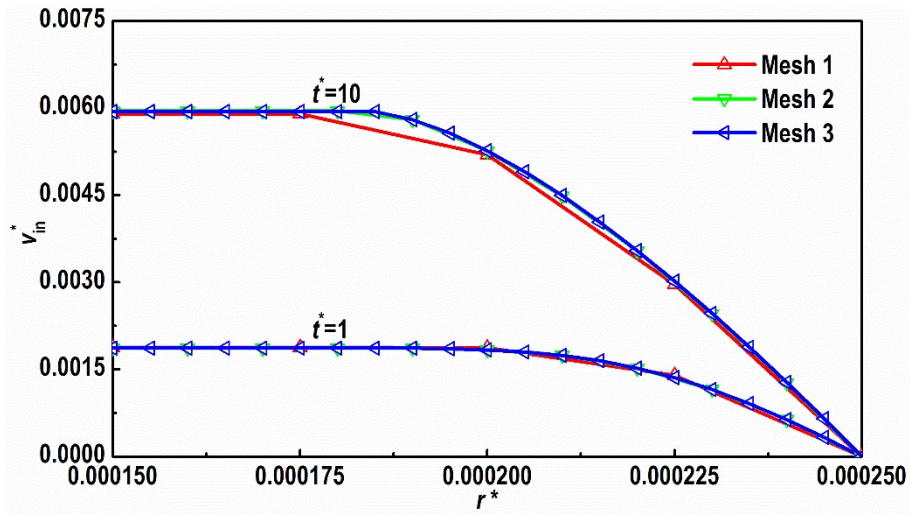

**Fig. S4.** Radial distribution of inlet velocity for different radial mesh sizes

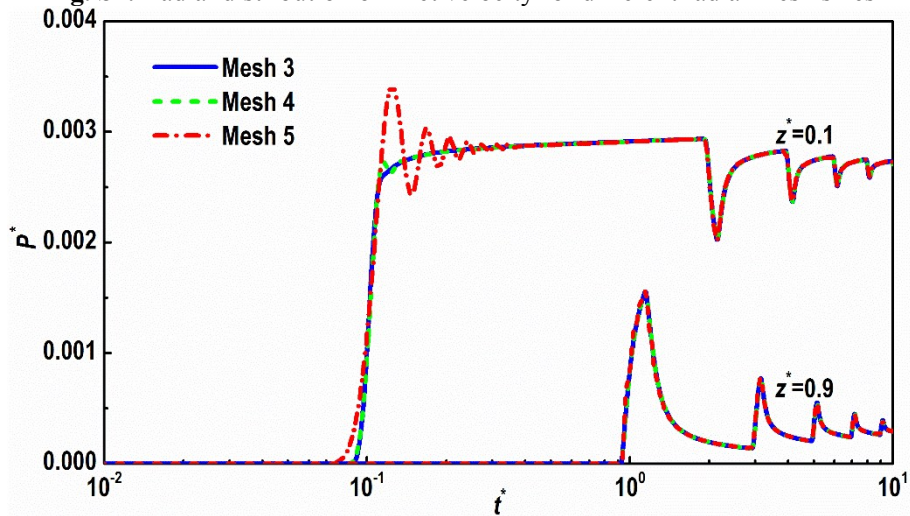

**Fig. S5.** Time evolution of pressure at the axial positions  $z^*=1$  and  $z^*=0.9$  for different axial mesh sizes
